# Supplementary material for: Variation in Oral Board Examination Accommodations Among Specialties
Source: PubMed Central journal article supplement (PMC11077388; doi:10.1001/jamanetworkopen.2024.10127), 2024-05-07
Supplement: jamanetwopen-e2410127-s001.pdf [file jamanetwopen-e2410127-s001.pdf]

## Supplemental Online Content

Rowe DG, Charles AJ, Luo EJ, et al. Variation in oral board examination accommodations among specialties. *JAMA Netw Open*. 2024;7(5):e2410127.  
doi:10.1001/jamanetworkopen.2024.10127

### **eMethods**

**eFigure.** Total Accommodation Score by Specialty

**eAppendix.** Policies and Practices of Oral Board Examinations

This supplemental material has been provided by the authors to give readers additional information about their work.

## eMethods

### Script for Phone Calls with Certifying Organizations

**Goal:** To assess executive director/board administration’s ability to provide information regarding accommodations and testing standards for oral examinations.

#### **Script:**

*Introduction:* “Hi, my name is [ \_\_\_\_ ]. I’m a medical student interested in [ \_\_\_\_ ] specialty. I was reviewing your website to learn about the path to becoming a board-certified [ \_\_\_\_ ] and wanted to see if I could get some more information about the oral exam?”

#### *Script:*

1. It appears that you offer these exams [ \_\_\_\_ ] times per year, [in person/virtually]. Is this correct?
  - a. [Use information from spreadsheet to fill-in blanks].
2. *If in person* (if virtual, skip this question):
  - a. Do all the examinees come to the same location or are the exams at a testing center?
  - b. What is the setting of the examinations (e.g., conference room, pods, hotel rooms, etc.)?
3. Do you have a policy for alternate dates for medical emergencies (Y/N)?
  - a. *If in-person:* Do you offer a virtual option in the event of medical emergencies? (Y/N)
4. Do you have a policy for alternate dates for family emergencies (e.g., death of a family member)? (Y/N)
  - a. *If in-person:* Do you offer a virtual option in the event of family emergencies? (Y/N)
5. Do you have a policy for alternate dates for military leave? (Y/N)
6. Do you offer accommodations for disabilities per the Americans with Disabilities Act? (Y/N)
7. Do you offer lactation accommodations for postpartum women? (Y/N)

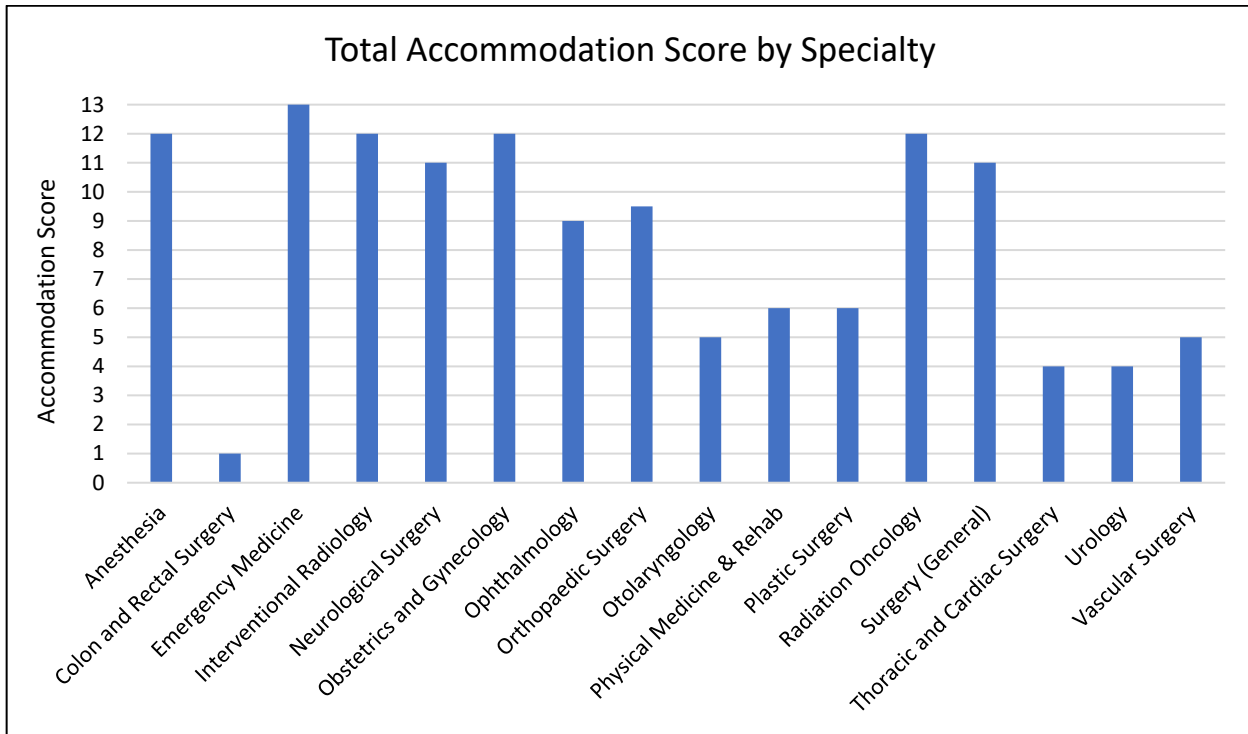

**eFigure.** Total Accommodation Score by Specialty

**eAppendix. Policies and Practices of Oral Board Examinations**

| Specialty                       | Exam Format | No. of Exams Offered Per Year | Exam Location                                                                             | Accommodations for Medical Leave/Emergency                                                                  | Accommodations for Family Emergency                                                                         | Accommodations for Military Leave/Deployment                                                                | Nursing/Lactation Accommodations                                                                                                                    |
|---------------------------------|-------------|-------------------------------|-------------------------------------------------------------------------------------------|-------------------------------------------------------------------------------------------------------------|-------------------------------------------------------------------------------------------------------------|-------------------------------------------------------------------------------------------------------------|-----------------------------------------------------------------------------------------------------------------------------------------------------|
| <b>Anesthesia</b>               | In-person   | 6x / year                     | Testing Center (Raleigh) - individual rooms/stations                                      | Yes - can submit request to change test date. No virtual alternatives offered.                              | Yes - can submit request to have test date changed. No virtual alternatives offered.                        | Yes - can submit request to have test date changed. No virtual alternatives offered.                        | Yes - nursing mothers can complete online form to request extra break time. Have a private room at the testing center that nursing mothers can use. |
| <b>Colon and Rectal Surgery</b> | In-person   | 1x / year                     | Omni Hotel (Chicago) - closed-off suite portion of hotel rooms (not the bedroom quarters) | No accommodations made - will have to postpone exam to the following year. No virtual alternatives offered. | No accommodations made - will have to postpone exam to the following year. No virtual alternatives offered. | No accommodations made - will have to postpone exam to the following year. No virtual alternatives offered. | "Potentially" could offer accommodations. Do not have an explicit policy for lactation/nursing mothers.                                             |
| <b>Emergency Medicine</b>       | Virtual     | 3x / year                     | Virtual                                                                                   | Yes - can switch to another test date within the same year.                                                 | Yes - can switch to another test date within the same year.                                                 | Yes - can switch to another test date within the same year.                                                 | Yes - candidates can have a pump during the exam and can request additional accommodations online.                                                  |
| <b>Interventional Radiology</b> | Virtual     | 2x / year                     | Virtual                                                                                   | Yes - can postpone to next exam date                                                                        | Yes - can postpone to next exam date                                                                        | Yes - can postpone to next exam date                                                                        | Yes - offer extended break time for nursing mothers.                                                                                                |

|                                  |           |           |                                                     |                                                                                                               |                                                                                                                                                                                                        |                                                                                                            |                                                                                      |
|----------------------------------|-----------|-----------|-----------------------------------------------------|---------------------------------------------------------------------------------------------------------------|--------------------------------------------------------------------------------------------------------------------------------------------------------------------------------------------------------|------------------------------------------------------------------------------------------------------------|--------------------------------------------------------------------------------------|
| <b>Neurological Surgery</b>      | Virtual   | 2x / year | Virtual                                             | Yes - candidate is deferred to next open exam.                                                                | Yes - candidate is deferred to next open exam.<br><br>Note - Any last minute cancellations are reviewed rigorously by the Board to make sure candidates are not cancelling due to lack of preparation. | Yes - candidates can either take the exam virtually from their deployment site or switch to next open exam | No accommodations made. Ask that candidates set aside the 3 hours for the oral exam. |
| <b>Obstetrics and Gynecology</b> | In-person | 4x / year | Testing Center (Dallas) - individual rooms/stations | Yes - candidate will get re-assigned to a new test date within the same year. No virtual alternative offered. | Yes - if candidate has legitimate family emergency, will get re-assigned to a new test date within the same year.                                                                                      | Yes - candidate will get re-assigned to a new test date.                                                   | Yes - candidates can request to use a dedicated lactation room before their exam.    |

|                      |         |           |         |                                                                                                                                                                                                                                                                                                                                                                                                             |                                                                                                                                                                                                                                                                                                                                                     |                                                                                                                                                                                                                                                                                            |                                                                       |
|----------------------|---------|-----------|---------|-------------------------------------------------------------------------------------------------------------------------------------------------------------------------------------------------------------------------------------------------------------------------------------------------------------------------------------------------------------------------------------------------------------|-----------------------------------------------------------------------------------------------------------------------------------------------------------------------------------------------------------------------------------------------------------------------------------------------------------------------------------------------------|--------------------------------------------------------------------------------------------------------------------------------------------------------------------------------------------------------------------------------------------------------------------------------------------|-----------------------------------------------------------------------|
| <b>Ophthalmology</b> | Virtual | 2x / year | Virtual | <p>In general, do not allow candidates to switch dates; candidate must cancel original exam and sign up for the next one, incurring cancellation fee.</p> <p>In the event of a medical illness, a letter would have to be sent in to the Board. The letter would be reviewed by leadership and then leadership will "take the next step from there" and consider whether to waive the cancellation fee.</p> | <p>In general, do not allow candidates to switch dates; candidate must cancel original exam and sign up for the next one, incurring cancellation fee.</p> <p>Candidates may submit a letter to the Board documenting the family emergency. The letter would be reviewed by leadership and then leadership will "take the next step from there".</p> | <p>In general, do not allow candidates to switch dates; candidate must cancel original exam and sign up for the next one, incurring cancellation fee.</p> <p>Candidates may submit a letter to the Board documenting their military leave. The letter would be reviewed by leadership.</p> | <p>Yes - will add 60-minutes extra break time for nursing mothers</p> |
|----------------------|---------|-----------|---------|-------------------------------------------------------------------------------------------------------------------------------------------------------------------------------------------------------------------------------------------------------------------------------------------------------------------------------------------------------------------------------------------------------------|-----------------------------------------------------------------------------------------------------------------------------------------------------------------------------------------------------------------------------------------------------------------------------------------------------------------------------------------------------|--------------------------------------------------------------------------------------------------------------------------------------------------------------------------------------------------------------------------------------------------------------------------------------------|-----------------------------------------------------------------------|

|                                      |           |           |                                                                                                                                                                                                             |                                                                            |                                                                            |                                                                                                                                                                                         |                                                                                                                                                                               |
|--------------------------------------|-----------|-----------|-------------------------------------------------------------------------------------------------------------------------------------------------------------------------------------------------------------|----------------------------------------------------------------------------|----------------------------------------------------------------------------|-----------------------------------------------------------------------------------------------------------------------------------------------------------------------------------------|-------------------------------------------------------------------------------------------------------------------------------------------------------------------------------|
| <b>Orthopaedic Surgery</b>           | In-person | 2x / year | <p>Site 1: Palmer House Hotel (Chicago) - exams conducted in booths created in the exhibit space on the 3rd/4th floors of the hotel</p> <p>Site 2: Testing Center (Raleigh) - individual rooms/stations</p> | Yes - can switch to next exam date. No virtual alternatives offered.       | Yes - can switch to next exam date. No virtual alternatives offered.       | Yes - can switch to next exam date. No virtual alternatives offered.                                                                                                                    | <p>Site 1: no lactation rooms available or additional break time offered.</p> <p>Site 2: lactation rooms available for nursing mothers. No additional break time offered.</p> |
| <b>Otolaryngology</b>                | Virtual   | 1x / year | Virtual                                                                                                                                                                                                     | No accommodations made - will have to postpone exam to the following year. | No accommodations made - will have to postpone exam to the following year. | <p>No accommodations made - will have to postpone exam to the following year.</p> <p>However, the Board will "try to schedule around military leave if candidates know in advance."</p> | No accommodations made. Candidates have a break between their exams sessions that they may use to pump                                                                        |
| <b>Physical Medicine &amp; Rehab</b> | Virtual   | 1x / year | Virtual                                                                                                                                                                                                     | No accommodations made - will have to postpone exam to the following year. | No accommodations made - will have to postpone exam to the following year. | Unclear policy regarding military deployment - "potentially could work around this."                                                                                                    | Yes - nursing mothers can request extended break time.                                                                                                                        |

|                                     |           |           |                                                        |                                                                                                                                                                     |                                                                                                                                                                     |                                                                                                                                                                     |                                                                                                                             |
|-------------------------------------|-----------|-----------|--------------------------------------------------------|---------------------------------------------------------------------------------------------------------------------------------------------------------------------|---------------------------------------------------------------------------------------------------------------------------------------------------------------------|---------------------------------------------------------------------------------------------------------------------------------------------------------------------|-----------------------------------------------------------------------------------------------------------------------------|
| <b>Plastic Surgery</b>              | In-person | 1x / year | Pointe Hilton (Phoenix) - suite portion of hotel rooms | Candidate can opt to take the exam virtually or can postpone by a year.                                                                                             | Candidate can opt to take the exam virtually or can postpone by a year.                                                                                             | Candidate can opt to take the exam virtually or can postpone by a year.                                                                                             | No accommodations made. Noted that the exams are only 45 minutes so candidates should not need extra time to pump.          |
| <b>Radiation Oncology</b>           | Virtual   | 2x / year | Virtual                                                | Yes - can switch to next exam date.                                                                                                                                 | Yes - can switch to next exam date.                                                                                                                                 | Yes - can switch to next exam date.                                                                                                                                 | Yes - nursing mothers are offered extended break time.                                                                      |
| <b>Surgery (General)</b>            | Virtual   | 2x / year | Virtual                                                | Yes - can switch to next available exam date.                                                                                                                       | Yes - can switch to next available exam date.                                                                                                                       | Yes - can switch to next available exam date.                                                                                                                       | No accommodations made. Noted that the exams are short (1.5-2 hours long) so candidates should not need extra time to pump. |
| <b>Thoracic and Cardiac Surgery</b> | In-person | 1x / year | Testing Center (Dallas) - individual rooms/stations    | No accommodations made - will have to postpone exam to the following year. No virtual alternatives offered.                                                         | No accommodations made - will have to postpone exam to the following year. No virtual alternatives offered.                                                         | No accommodations made - will have to postpone exam to the following year. No virtual alternatives offered.                                                         | Yes - candidates can request to use a dedicated lactation room.                                                             |
| <b>Urology</b>                      | In-person | 1x / year | Testing Center (Raleigh) - individual rooms/stations   | No accommodations made - will have to postpone exam to the following year. No virtual alternatives offered. Can extend window of admissibility for excused absence. | No accommodations made - will have to postpone exam to the following year. No virtual alternatives offered. Can extend window of admissibility for excused absence. | No accommodations made - will have to postpone exam to the following year. No virtual alternatives offered. Can extend window of admissibility for excused absence. | Yes - candidates can request to use a dedicated lactation room and will get extra break time if needed.                     |



|                         |         |           |         |                                                                            |                                                                            |                                                                            |                                                                                                                                                                           |
|-------------------------|---------|-----------|---------|----------------------------------------------------------------------------|----------------------------------------------------------------------------|----------------------------------------------------------------------------|---------------------------------------------------------------------------------------------------------------------------------------------------------------------------|
| <b>Vascular Surgery</b> | Virtual | 1x / year | Virtual | No accommodations made - will have to postpone exam to the following year. | No accommodations made - will have to postpone exam to the following year. | No accommodations made - will have to postpone exam to the following year. | "Typically we haven't had to accommodate nursing mothers because the exam is only an hour and a half. But individuals can request any accommodation through the website." |
|-------------------------|---------|-----------|---------|----------------------------------------------------------------------------|----------------------------------------------------------------------------|----------------------------------------------------------------------------|---------------------------------------------------------------------------------------------------------------------------------------------------------------------------|
