# Supplementary material for: Variation in Oral Board Examination Accommodations Among Specialties
Source: PubMed Central journal article supplement (PMC11077388; doi:10.1001/jamanetworkopen.2024.10127), 2024-05-07
Supplement: jamanetwopen-e2410127-s002.pdf [file jamanetwopen-e2410127-s002.pdf]

## Data Sharing Statement

Rowe. Variation in Oral Board Examination Accommodations Among Specialties. *JAMA Netw Open*. Published May 07, 2024. doi:10.1001/jamanetworkopen.2024.10127

### Data

**Data available:** Yes

**Data types:** Data (not involving human participants)

**How to access data:** [melissa.erickson@duke.edu](mailto:melissa.erickson@duke.edu)

**When available:** With publication

### Supporting Documents

**Document types:** None

### Additional Information

**Who can access the data:** researchers whose proposed use of the data has been approved

**Types of analyses:** for approved purposes

**Mechanisms of data availability:** Shared via excel after approval of proposal by principle investigator
